# Supplementary material for: In vivo genome editing with a small Cas9 orthologue derived from Campylobacter jejuni
Source: PubMed Central journal article supplement (PMC5473640; doi:10.1038/ncomms14500), 2017-02-21
Supplement: ncomms14500-s1.pdf [file ncomms14500-s1.pdf]

| <b>Protein coding sequence of CjCas9</b>                                                                                                                                                                                                                                                                                                                                                                                                                                                                                                                                                                                                                                                                                                                                                                                                                                                                                                                                                                                                                                                                                      | <b>Size</b>   |
|-------------------------------------------------------------------------------------------------------------------------------------------------------------------------------------------------------------------------------------------------------------------------------------------------------------------------------------------------------------------------------------------------------------------------------------------------------------------------------------------------------------------------------------------------------------------------------------------------------------------------------------------------------------------------------------------------------------------------------------------------------------------------------------------------------------------------------------------------------------------------------------------------------------------------------------------------------------------------------------------------------------------------------------------------------------------------------------------------------------------------------|---------------|
| MARILAFDIGISSIGWAFSENDELKDCGVRIFTKVENPKTGESLALPRRLARSAR<br>KRLARRKARLNHLKHLIANEFKLNIEDYQSFDESLAKAYKGSLSIPYELRFRALN<br>ELLSKQDFARVILHIAKRRGYDDIKNSDDKEKGAILKAIKQNEEKLANYSVGEY<br>LYKEYFQKFKENSKEFTNVRNKESYERCIQSFLKDELKLIFFKKQREFGFSFSK<br>KFEEEVLSVAFYKRALKDFSHLVGNCSFFTDEKRAPKNSPLAFMFVALTRINLL<br>NNLKNTEGILYTKDDLNALLNEVLKNGTLTYKQTKLLGLSDDYEFKGEKGTYFI<br>EFKKYKEFIKALGEHNLSQDDLNEIAKDITLIKDEIKLKKALAKYDLNQNQIDSL<br>SKLEFKDHLNISFKALKLVTPMLLEGKKYDEACNELNLKVAINEDKKDFLPAFNE<br>TYKDEVTNPVVLRAIKEYRKVLNALLKKGKVKHINIELAREVGNHNSQRAKIE<br>KEQENENYKAKKDAELECEKLGKINSKNILKRLRFKEQKEFCAYSGEKIKISDLQ<br>DEKMLEIDHIYPYSRSDDSYMNKVLVFTKQNEKLNQTPFEAFGNDSAKWQKIE<br>VLAKNLPKKQKRILDKNYKDKQKFNFKDRNLNDTRYIARLVLNQTKDYLDLFLPL<br>SDDENTKLNQTKGSKVHVEAKSGMLTSALRHTWGFSAKDRNNHLHHAIDAVIIA<br>YANNSIVKAFSDFKKEQESNSAELYAKKISELDYKNKRKFFEPFSGFRQKVLDKI<br>DEIFVSKPERKKPSGALHEETFREKEEFYQSYGGKEGVLKALELGKIRKVNKIV<br>KNGDMFRVDIFKHKKTNKFYAVPIYTMDFALKVLPNKAVARSKKGEIKDWILMDE<br>NYEFCFSLYKDSLILIQTKDMQEPFVYNAFTSSTVSLIVSKHDNKFETLSKNQ<br>KILFKNANEKEVIAKSIGIQNLKVFEKYIVSALGEVTKAEFRQREDFKKS <del>GGPPKK</del><br><u>KRKVYPYDVPDYA</u> - | 1003 aa       |
| <b>sgRNA sequence of CjCas9</b>                                                                                                                                                                                                                                                                                                                                                                                                                                                                                                                                                                                                                                                                                                                                                                                                                                                                                                                                                                                                                                                                                               | <b>Linker</b> |
| NNNNNNNNNNNNNNNNNNNGTTTAGTCCCTGAAAAGGGACTAAAATAAAGAGTTTGCG<br>GGACTCTGCGGGGTTACAATCCCCTAAAACCGCTTTTTT                                                                                                                                                                                                                                                                                                                                                                                                                                                                                                                                                                                                                                                                                                                                                                                                                                                                                                                                                                                                                         | GAAA          |
| NNNNNNNNNNNNNNNNNNNGTTTAGTCCCTGAAGGGACTAAAATAAAGAGTTTGCGGG<br>ACTCTGCGGGGTTACAATCCCCTAAAACCGCTTTTTT                                                                                                                                                                                                                                                                                                                                                                                                                                                                                                                                                                                                                                                                                                                                                                                                                                                                                                                                                                                                                           | TGAA          |
| <b>Native dual guide RNA sequences of CjCas9</b>                                                                                                                                                                                                                                                                                                                                                                                                                                                                                                                                                                                                                                                                                                                                                                                                                                                                                                                                                                                                                                                                              |               |
| NNNNNNNNNNNNNNNNNNNGUUUUAGUCCCUUUUUAAAUUUCUUUAUGGUAAAU                                                                                                                                                                                                                                                                                                                                                                                                                                                                                                                                                                                                                                                                                                                                                                                                                                                                                                                                                                                                                                                                        | crRNA         |
| AAGAAAUUUAAAAGGGACUAAAUAAGAGUUUGCGGGACUCUGCGGGGUUACAAUCCC<br>CUAAAACCGCUUUU                                                                                                                                                                                                                                                                                                                                                                                                                                                                                                                                                                                                                                                                                                                                                                                                                                                                                                                                                                                                                                                   | tracrRNA      |

**Supplementary Figure 1. CjCas9 and sgRNA structure.** The amino acid sequence of the CjCas9 protein and its sgRNA sequences are shown. A nuclear localization signal (underlined) and a single HA epitope (bold) were fused to the C-terminus of the 984 aa CjCas9 protein. Two different sgRNA scaffolds were designed and tested in this study. To decrease the packaging size of the AAV virus vector, sgRNA sequences with a TGAA linker was used in *in vivo* studies.

| Human AAVS1                                                                                                                                                                                                                                                                                                                                                                           | Mouse ROSA26                                                                                                                                                                                                                                                                                                                                                                                                                                                                                                                                                                                                                                                                                                                              | Mouse TP53                                                                                                                                                                                                                                                                                                                                                                                                                                                                                                                                                                                                                                                                                                                                                                                                                                                                                                                                                                                                                                                                                                                        |
|---------------------------------------------------------------------------------------------------------------------------------------------------------------------------------------------------------------------------------------------------------------------------------------------------------------------------------------------------------------------------------------|-------------------------------------------------------------------------------------------------------------------------------------------------------------------------------------------------------------------------------------------------------------------------------------------------------------------------------------------------------------------------------------------------------------------------------------------------------------------------------------------------------------------------------------------------------------------------------------------------------------------------------------------------------------------------------------------------------------------------------------------|-----------------------------------------------------------------------------------------------------------------------------------------------------------------------------------------------------------------------------------------------------------------------------------------------------------------------------------------------------------------------------------------------------------------------------------------------------------------------------------------------------------------------------------------------------------------------------------------------------------------------------------------------------------------------------------------------------------------------------------------------------------------------------------------------------------------------------------------------------------------------------------------------------------------------------------------------------------------------------------------------------------------------------------------------------------------------------------------------------------------------------------|
| <b>AAVS1-TS2</b><br>AAGGAAAGGGAGGTAGAGGGCCACGAC-CTGGTGAACACCTTAGGACGCA WT<br>AAGGAAAGGGAGGTAGAGGGCCACGAC--TGGTGAACACCTTAGGACGCA -1<br>AAGGAAAGGGAGGTAGAGGGCCACGAC--GGTGAACACCTTAGGACGCA -2<br>AAGGAAAGGGAGGTAGAGGGCCACGACCTGGTGAACACCTTAGGACGCA +1<br>AAGGAAAGGGAGGTAGAGGGCCACGACCTGGTGAACACCTTAGGACGCA +1<br>AAGGAAAGGGAGGTAGAGGGCCACGACCTGGTGAACACCTTAGGACGCA +1                    | <b>ROSA26-TS1</b><br>CAGGAGGACAGAGAACTCCCAAGAAAG--TATTGCAACACTCCCTCCCTCC WT<br>CAGGAGGACAGAGAA--TATTGCAACACTCCCTCCCTCC -22<br>CAGGAGGACAGAGAACTCCCAAGAAAG--TATTGCAACACTCCCTCCCTCC -1<br>CAGGAGGACAGAGAACTCCCAAGAA--TATTGCAACACTCCCTCCCTCC -2<br>CAGGAGGACAGAGAACTCCCAAGAA--TATTGCAACACTCCCTCCCTCC -10<br>CAGGAGGACAGAGAACTCCCAAGAA--TATTGCAACACTCCCTCCCTCC -11<br><b>ROSA26-TS2</b><br>TACACCTGTTCAATTCCTCCGAGAGACA--GCCCCACACACAGGTTAGCC WT<br>TACACCTGTTCAATTCCTCCGAGAGACA--GCCCCACACACAGGTTAGCC -1<br>TACACCTGTTCAATTCCTCCGAGAGACA--GCCCCACACACAGGTTAGCC -3<br>TACACCTGTTCAATTCCTCCGAGAGACA--GCCCCACACACAGGTTAGCC -7<br>TACACCTGTTCAATTCCTCCGAGAGACA--GCCCCACACACAGGTTAGCC +1<br>TACACCTGTTCAATTCCTCCGAGAGACA--GCCCCACACACAGGTTAGCC +1 | <b>TP53-TS1</b><br>TGCTTGGACAATGTGTTTCATTAGTTCGCCACCTTGACACCTGATGTTA WT<br>TGCTTGGACAATGTGTTTCATTAGTTCGCC-ACCTTGACACCTGATGTTA -1<br>TGCTTGGACAATGTGTTTCATTAGTTCGCC--CTTGACACCTGATGTTA -2<br>TGCTTGGCTGGTCC--(105BP DEL)-----CTCCTCTTCACAGT -105<br><b>TP53-TS2</b><br>GCGAAGACGTGCCCTGTGCACTTGTGGGT--GAGGCCACACCTCCAGCTGG WT<br>GCGAAGACGTGCCCTGTGCACTTGTGGGT--GAGGCCACACCTCCAGCTGG -1<br>GCGAAGACGTGCCCTGTGCACTTGTGG--GAGGCCACACCTCCAGCTGG -5<br>GCGAAGACGTGCCCTGTGCACTTGTGG--GAGGCCACACCTCCAGCTGG -21<br>GCGAAGACGTGCCCTGTGCACTTGTGGGTCCAGGCCACACCTCCAGCTGG +1<br>GCGAAGACGTGCCCTGTGCACTTGTGG--ACACCTCCAGCTGG -10<br><b>TP53-TS3</b><br>CATGAGCGCTGCTCCGATGGTATGTTAA--GCCCTCAACACCGCCTGTGGG WT<br>CATGAGCGCTGCTCCGATGGTATGTTAA--GCCCTCAACACCGCCTGTGGG +1<br>CATGAGCGCTGCTCCGATGGTATGTTAA--GCCCTCAACACCGCCTGTGGG +1<br>CCCCACCATGAGGG--34BP DEL-----CCTGTGGGTTAGGA-34<br><b>TP53-TS4</b><br>AGTAACGATCAGGTGTCAAGGTGGGGAAC--TAATGAACACATTGTCCAAG WT<br>AGTAACGATCAGGTGTCAAGGTGGGGAAC--TAATGAACACATTGTCCAAG +1<br>AGTAACGATCAGGTGTCAAGGTGGGGAAC--TAATGAACACATTGTCCAAG -1<br>AGTAACGATCAGGTGTCAAGGTGGGGAAC--TAATGAACACATTGTCCAAG -2 |
| <b>AAVS1-TS3</b><br>AACTAGGAGCCACCAATCTCACAAAGGAG--GTTTCCACACCGGACACCCCTCC WT<br>AACTAGGAGCCACCAATCTCACAAAGGAG--GTTTCCACACCGGACACCCCTCC -1<br>AACTAGGAGCCACCAATCTCACAAAGGAG--GTTTCCACACCGGACACCCCTCC +1<br>AACTAGGAGCCACCAATCTCACAAAGGAG--GTTTCCACACCGGACACCCCTCC +1<br>AACTAGGAGCCACCAATCTCACAAAG--GTTTCCACACCGGACACCCCTCC -14<br>AACTAGGAGCCACCAATCTCAC--GTTTCCACACCGGACACCCCTCC -7 | <b>ROSA26-TS4</b><br>AATGATTAAATTCGTCTACATAGTCTA--ACTCGGACACTGTAATTTC WT<br>AATGATTAAATTCGTCTACATAGTCTA--ACTCGGACACTGTAATTTC -1<br>AATGATTAAATTCGTCTACATAGTCTA--ACTCGGACACTGTAATTTC +1<br>TGAATGACTG-----92BP DEL-----TAAACTGG -92<br>AATGATTAAATTCGTCTACATAGTCTA--ACTCGGACACTGTAATTTC -6<br>GAAAGAGGG--96BP DEL-----ATCTCAAGCA -96<br><b>ROSA26-TS5</b><br>CGCTCCTTCTGCAGCCTTATCAAAAAGTA--TTTGAACACTCATTTTAGC WT<br>CGCTCCTTCTGCAGCCTTATCAAAAAGTA--TTTGAACACTCATTTTAGC +1<br>CGCTCCTTCTGCAGCCTTATCAAAAAGT--TTTGAACACTCATTTTAGC -2<br>CGCTCCTTCTGCAGCCTTATCAAAAAGT--TTTGAACACTCATTTTAGC -1<br>CGCTCCTTCTGCAGCCTTATCAAAAAGTA--TTTGAACACTCATTTTAGC +1<br>CGCTCCTTCTGCAGCCTTATCAAAAAGTA--TTTGAACACTCATTTTAGC -2                              | <b>TP53-TS5</b><br>GGTGGGTTTACAGTACCTGGTCTGTCAG--CTTCTTACACTTCCCAAGAG WT<br>GGTGGGTTTACAGTACCTGGTCTGTCAG--CTTCTTACACTTCCCAAGAG +1<br>GGTGGGTTTACAGTACCTGGTCTGTCAG--CTTCTTACACTTCCCAAGAG +1<br>GGTGGGTTTACAGTACCTGGTCTGTCAG--CTTCTTACACTTCCCAAGAG +1<br>GGTGGGTTTACAGTACCTGGTCTGTCAG--CTTCTTACACTTCCCAAGAG +1<br>GGTGGGTTTACAGTACCTGGTCTGTCAG--CTTCTTACACTTCCCAAGAG +2                                                                                                                                                                                                                                                                                                                                                                                                                                                                                                                                                                                                                                                                                                                                                             |
| <b>AAVS1-TS6</b><br>CCCACCTCCTGTAGCAGATTCCTATC--TGGTGAACACCCCAATTTCC WT<br>CCCACCTCCTGTAGCAGATTCCTATC--TGGTGAACACCCCAATTTCC +1<br>CCCACCTCCTGTAGCAGATTCCTATC--TGGTGAACACCCCAATTTCC +1<br>CCCACCTCCTGTAGCAGATTCCTATC--TGGTGAACACCCCAATTTCC +1<br>CCCACCTCCTGTAGCAGATTCCTATC--TGGTGAACACCCCAATTTCC -1<br>CCCACCTCCTGTAGCAGATTCCTATC--TGGTGAACACCCCAATTTCC +1                            | <b>ROSA26-TS6</b><br>TCTGATGACTCATGAAACAGACAGATTA--GTTACATACACACAAATGGA WT<br>TCTGATGACTCATGAAACAGACAGATTA--GTTACATACACACAAATGGA +1<br>TCTGATGACTCATGAAACAGACAGATTA--GTTACATACACACAAATGGA -4<br>TCTGATGACTCATGAAACAGACAGATTA--GTTACATACACACAAATGGA +1<br>TCTGATGACTCATGAAACAGACAGATTA--GTTACATACACACAAATGGA +1<br>TCTGATGACTCATGAAACAGACAGATTA--GTTACATACACACAAATGGA -52<br>TCTGATGACTCATGAAACAGACAGATTA--GTTACATACACACAAATGGA -12                                                                                                                                                                                                                                                                                                        | <b>TP53-TS6</b><br>CATACACCAAAATCGAGGCTGTAGCTGG--GCCCTCAACACTGCAGTTCCT WT<br>CATACACCAAAATCGAGGCTGTAGCTGG--GCCCTCAACACTGCAGTTCCT -2<br>CATACACCAAAATCGAGGCTGTAGCTGG--GCCCTCAACACTGCAGTTCCT -4<br>CATACACCAAAATCGAGGCTGTAGCTGG--GCCCTCAACACTGCAGTTCCT -1<br>CATACACCAAAATCGAGGCTGTAGCTGG--GCCCTCAACACTGCAGTTCCT -1<br>CATACACCAAAATCGAGGCTGTAGCTGG--GCCCTCAACACTGCAGTTCCT -6<br>CATACACCAAAATCGAGGCTGTAGCTGG--GCCCTCAACACTGCAGTTCCT -12                                                                                                                                                                                                                                                                                                                                                                                                                                                                                                                                                                                                                                                                                            |
| <b>AAVS1-TS7</b><br>TAGCCACCTCTCCATCCCTGTGCTTCT--TGCCTGGACACCCCGTCTCC WT<br>TAGCCACCTCTCCATCCCTGTGCTTCT--TGCCTGGACACCCCGTCTCC +1<br>TAGCCACCTCTCCATCCCTGTGCTTCT--TGCCTGGACACCCCGTCTCC -1<br>TAGCCACCTCTCCATCCCTGTGCTTCT--TGCCTGGACACCCCGTCTCC +1<br>TAGCCACCTCTCCATCCCTGTGCTTCT--TGCCTGGACACCCCGTCTCC +1<br>TAGCCACCTCTCCATCCCTGTGCTTCT--TGCCTGGACACCCCGTCTCC -1                      | <b>ROSA26-TS7</b><br>CATACACCAAAATCGAGGCTGTAGCTGG--GCCCTCAACACTGCAGTTCCT WT<br>CATACACCAAAATCGAGGCTGTAGCTGG--GCCCTCAACACTGCAGTTCCT -2<br>CATACACCAAAATCGAGGCTGTAGCTGG--GCCCTCAACACTGCAGTTCCT -4<br>CATACACCAAAATCGAGGCTGTAGCTGG--GCCCTCAACACTGCAGTTCCT -1<br>CATACACCAAAATCGAGGCTGTAGCTGG--GCCCTCAACACTGCAGTTCCT -1<br>CATACACCAAAATCGAGGCTGTAGCTGG--GCCCTCAACACTGCAGTTCCT -6<br>CATACACCAAAATCGAGGCTGTAGCTGG--GCCCTCAACACTGCAGTTCCT -12                                                                                                                                                                                                                                                                                                  | <b>TP53-TS7</b><br>CATACACCAAAATCGAGGCTGTAGCTGG--GCCCTCAACACTGCAGTTCCT WT<br>CATACACCAAAATCGAGGCTGTAGCTGG--GCCCTCAACACTGCAGTTCCT -2<br>CATACACCAAAATCGAGGCTGTAGCTGG--GCCCTCAACACTGCAGTTCCT -4<br>CATACACCAAAATCGAGGCTGTAGCTGG--GCCCTCAACACTGCAGTTCCT -1<br>CATACACCAAAATCGAGGCTGTAGCTGG--GCCCTCAACACTGCAGTTCCT -1<br>CATACACCAAAATCGAGGCTGTAGCTGG--GCCCTCAACACTGCAGTTCCT -6<br>CATACACCAAAATCGAGGCTGTAGCTGG--GCCCTCAACACTGCAGTTCCT -12                                                                                                                                                                                                                                                                                                                                                                                                                                                                                                                                                                                                                                                                                            |

**Supplementary Figure 2. CjCas9 can modify diverse sites in the human and mouse genome.** Mouse *Rosa26* and *TP53* targetable GX<sub>22</sub> guide RNAs were designed and transfected into mouse NIH/3T3 cells together with CjCas9 plasmid. Genome editing efficiencies were examined by deep sequencing using genome DNA isolated from cells after 48 h of transfection. Evidence of genome editing by CjCas9 at the human *AAVS1* and mouse *Rosa26* and *TP53* loci. Red arrows indicate cleavage positions within the 22-bp target sequences (bold), which are followed by the PAM motif (red). Inserted nucleotides are shown in light blue. The number of CjCas9-mediated inserted (+) or deleted (-) nucleotides is indicated to the right. Error bars indicate s.e.m. (n = 3).

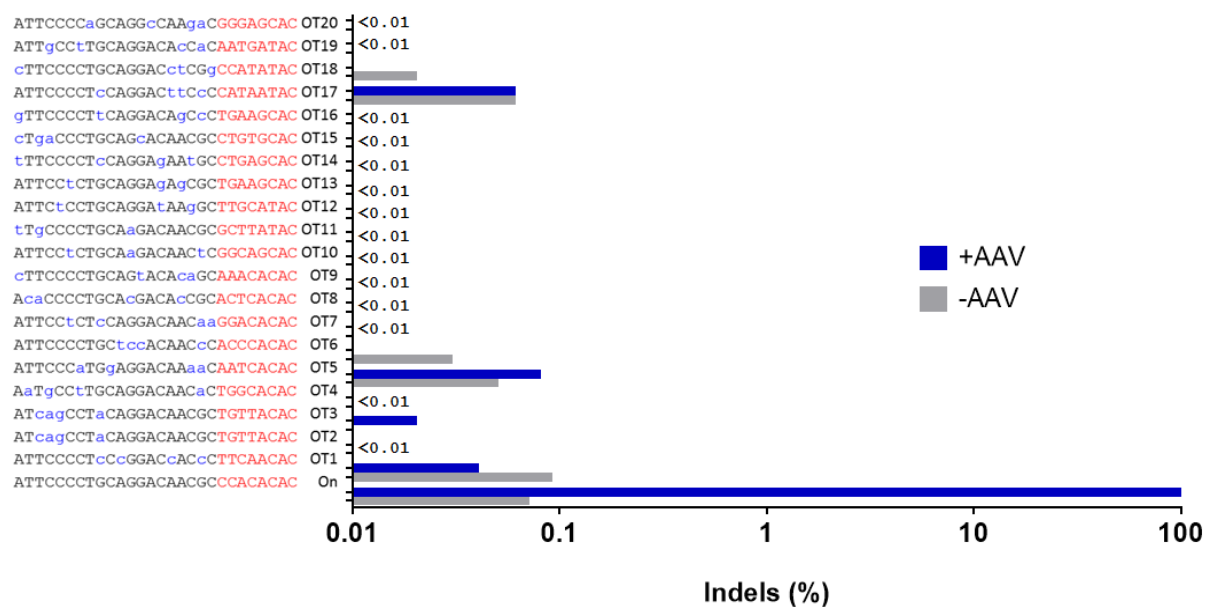

**Supplementary Figure 3. Mutation frequencies at potential off-target sites measured by targeted deep sequencing.**

Twenty-one possible off-target sites in the genome that differed from the on-target site by up to 4 nucleotides were examined by targeted deep sequencing in C2C12 mouse myoblast cells infected with AAVDJ-CjCas9 at day 14 post-injection. The mismatched nucleotides are shown in blue and the PAM sequences in red.

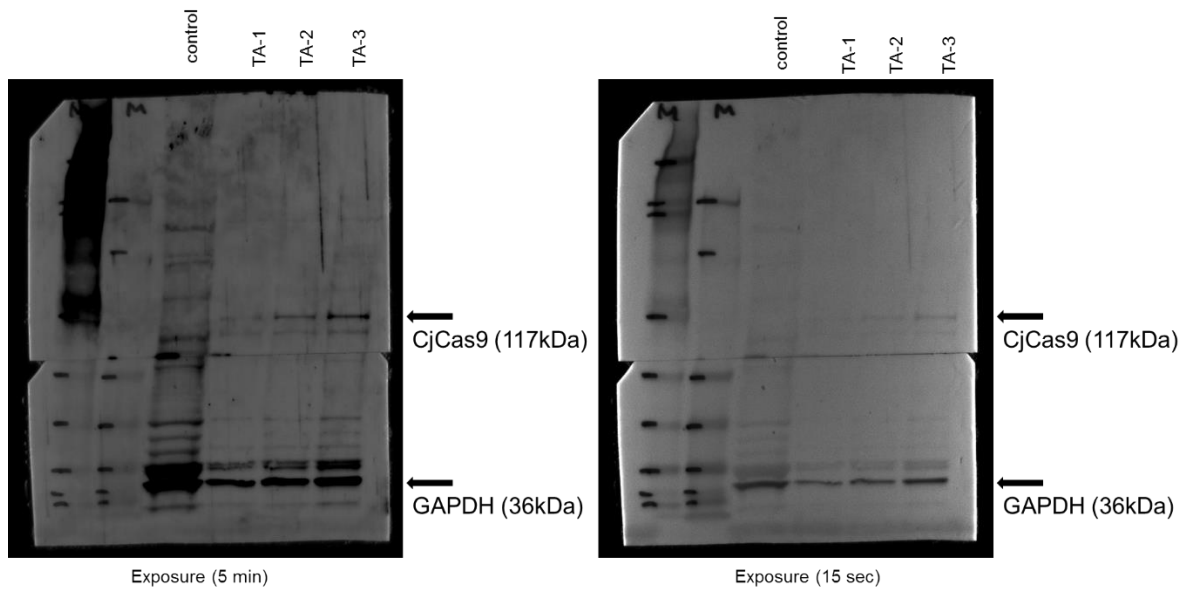

#### Supplementary Figure 4. Western blotting of CjCas9.

Representative western blot analysis detecting the CjCas9 protein in TA muscles of C57BL/6 mice 8 months after injection with AAV9-CjCas9 (n = 3). Uninjected TA muscles were used as the negative control. TA-1, -2, and -3 represent TA muscle samples from three C57BL/6 mice injected with AAV.

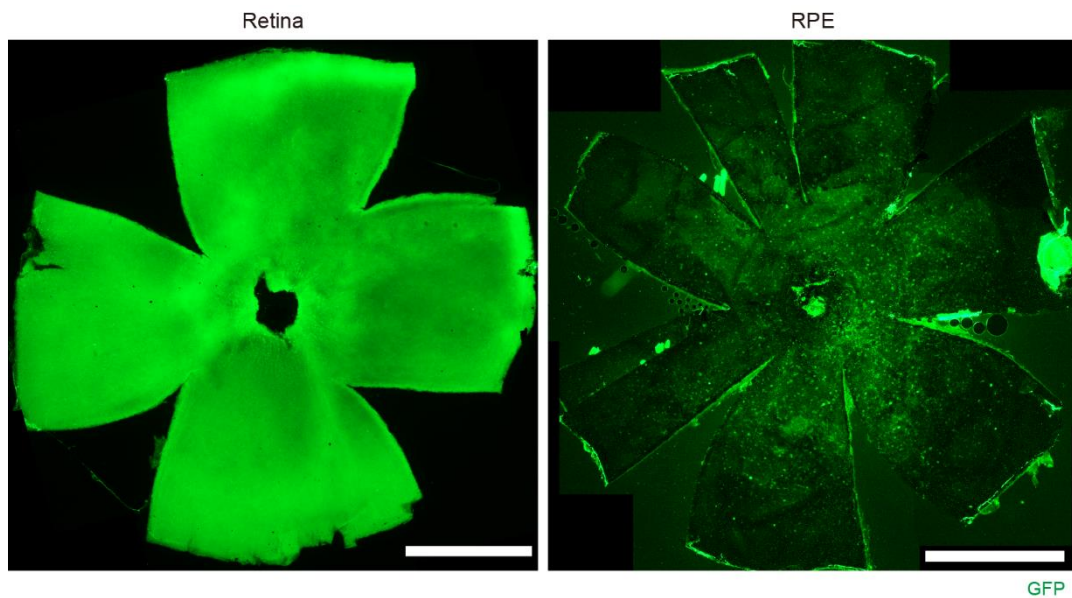

**Supplementary Figure 5. Viral transduction efficiency in retina and RPE at 6 weeks post injection of AAV9-CjCas9-Hif1a.**

Representative images of eGFP expression in retina and RPE cells of AAV-CjCas9-Hif1a-injected mice 6 weeks after intravitreal injection (n = 6). eGFP was stained with anti-GFP antibody (green). Scale bar is 1 mm.

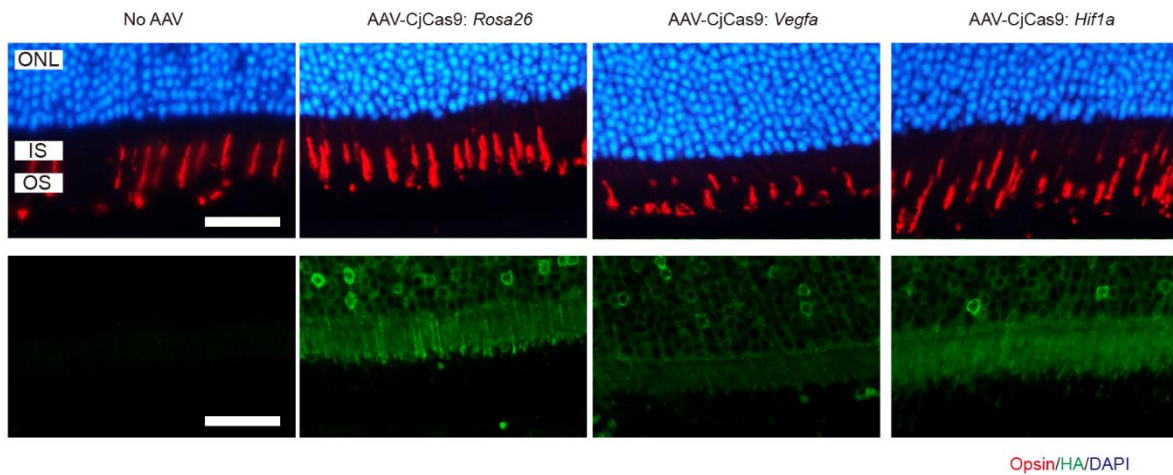

**Supplementary Figure 6. Opsin positive areas in the retinas of AAV9-CjCas9-injected mice at 6 weeks post injection.**

Representative images of opsin positive areas corresponding to RPE cells expressing HA-tagged CjCas9 in AAV-CjCas9: *Rosa26*, *Vegfa*, or *Hif1a* injected mice compared to the AAV-uninjected negative control mice (no AAV). Opsin (red), HA (green), and DAPI (blue). Scale bar is 20  $\mu$ m. ONL: outer nuclear layer, IS: inner segment of photoreceptor cells, OS: outer segment of photoreceptor cells.

**Supplementary Table 1. CjCas9 sgRNA list used in this study.**

| Target site | SgRNA              | Target sequences (5' to 3')     | PAM (5' to 3')                  |          |
|-------------|--------------------|---------------------------------|---------------------------------|----------|
| 1           | <i>AAVSI</i> -TS1  | GAATATAAGGTGGTCCCAGCTCGGGGACAC  | NNNNACAC                        |          |
| 2           | <i>AAVSI</i> -TS2  | GAGTAGAGGCGGCCACGACCTGGTGAACAC  | NNNNACAC                        |          |
| 3           | <i>AAVSI</i> -TS3  | CACCATTCTCACAAGGGAGTTTTCCACAC   | NNNNACAC                        |          |
| 4           | <i>AAVSI</i> -TS4  | TCTCACAAGGGAGTTTTCCACACGGACAC   | NNNNACAC                        |          |
| 5           | <i>AAVSI</i> -TS5  | ACTGATCCTGGTGCTGCAGCTTCCTTACAC  | NNNNACAC                        |          |
| 6           | <i>AAVSI</i> -TS6  | GTTAGGCAGATTCCCTTATCTGGTGACACAC | NNNNACAC                        |          |
| 7           | <i>AAVSI</i> -TS7  | TCCATCCTCTTGCTTTCTTTGCCTGGACAC  | NNNNACAC                        |          |
| 8           | <i>AAVSI</i> -TS8  | GGAGTGTGACAGCCTGGGGCCAGGCACAC   | NNNNACAC                        |          |
| 9           | <i>AAVSI</i> -TS9  | AGGGAGCCACGAAAACAGATCCAGGGACAC  | NNNNACAC                        |          |
| 10          | <i>AAVSI</i> -TS10 | TCCCTCTGGAGTCCCAGCTTGCTGGGACAC  | NNNNACAC                        |          |
| 11          | <i>AAVSI</i> -TS11 | CTGGTGTGCTGTGTGTGGGGTGGGGGACAC  | NNNNACAC                        |          |
| 12          | <i>AAVSI</i> -TS12 | GCCATGCGGGAGGACTAGCTAGTGGGACAC  | NNNNACAC                        |          |
| 13          | <i>AAVSI</i> -TS15 | CACCCCAATGCTCCAGGCCTCCTGGGATAC  | NNNNATAC                        |          |
| 14          | <i>AAVSI</i> -TS16 | GTGGGGTGAGGAGAAGGCTGGGAGGGATAC  | NNNNATAC                        |          |
| 15          | <i>AAVSI</i> -TS17 | AAGTTATGAGCAATTTCTGCAGGAAAATAC  | NNNNATAC                        |          |
| 16          | <i>AAVSI</i> -TS18 | GCAGGAGGTTTTCTTGTGGCAGGAGATAC   | NNNNATAC                        |          |
| 17          | <i>AAVSI</i> -TS19 | AAACCAAAACAAAAAGGCAATTTATATAC   | NNNNATAC                        |          |
| 18          | <i>AAVSI</i> -TS20 | TCTCAGAGTGAAAAAATGTGGTAAAATAC   | NNNNATAC                        |          |
| 19          | Human <i>AAVSI</i> | <i>AAVSI</i> -TS21              | GCTCCGACCTCTTACTACTGCAAACAATAC  | NNNNATAC |
| 20          |                    | <i>AAVSI</i> -TS22              | GCCACGACCTGGTGAACACCTAGGACGCAC  | NNNNGCAC |
| 21          |                    | <i>AAVSI</i> -TS23              | AGCTGCAGCACCAGGATCAGTAAAACGCAC  | NNNNGCAC |
| 22          |                    | <i>AAVSI</i> -TS24              | CTCTTGGGAAGTGTAAAGGAAGCTGCAGCAC | NNNNGCAC |
| 23          |                    | <i>AAVSI</i> -TS25              | GGCCTTATCTCACAGGTA AAACTGACGCAC | NNNNGCAC |
| 24          |                    | <i>AAVSI</i> -TS26              | GCCATGACAGGGGGCTGGAAGAGCTAGCAC  | NNNNGCAC |
| 25          |                    | <i>AAVSI</i> -TS27              | TGCTGCCCAAGGATGCTCTTCCGGAGCAC   | NNNNGCAC |
| 26          |                    | <i>AAVSI</i> -TS28              | GGCTCTAGGCATAGCTTGATCCAGGGGCAC  | NNNNGCAC |
| 27          |                    | <i>AAVSI</i> -TS29              | TGGCATGGCTCTAGTGCTTCCAGGGGCAC   | NNNNGCAC |
| 28          |                    | <i>AAVSI</i> -TS30              | GCTGTTTGGTGGTGTGTGCTGTGGGGCAC   | NNNNGCAC |
| 29          |                    | <i>AAVSI</i> -TS31              | GAAGGGGGCTGCAGGGGAGGGGTGGAGCAC  | NNNNGCAC |
| 30          |                    | <i>AAVSI</i> -TS32              | GCCGGTTAATGTGGCTCTGGTTCTGGGTAC  | NNNNGTAC |
| 31          |                    | <i>AAVSI</i> -TS33              | CTGTGGGGTGGAGGGGACAGATAAAAGTAC  | NNNNGTAC |
| 32          |                    | <i>AAVSI</i> -TS34              | GAGGTGGCTAAAGCCAGGGAGACGGGGTAC  | NNNNGTAC |
| 33          |                    | <i>AAVSI</i> -TS35              | CCAAGTGGTTGATAAAACCCACGTGGGGTAC | NNNNGTAC |
| 34          |                    | <i>AAVSI</i> -TS36              | CATTCTGAGACTGTGTTGCAGGCATTGTAC  | NNNNGTAC |
| 35          |                    | <i>AAVSI</i> -TS37              | CTGGACCCCATATGAAGGCTCCTGGGGTAC  | NNNNGTAC |
| 36          |                    | <i>AAVSI</i> -TS38              | CTGAGTGGGACACACGACTGCATGGAGTAC  | NNNNGTAC |
| 37          |                    | <i>AAVSI</i> -TS39              | GATTGTGCTGTCAGGAGCTCGGGGAGTAC   | NNNNGTAC |

|    |                     |                    |                                 |          |
|----|---------------------|--------------------|---------------------------------|----------|
| 38 |                     | <i>Rosa26</i> -TS1 | CAGAGAACTCCCAGAAAGGTATTGCAACAC  | NNNNACAC |
| 39 |                     | <i>Rosa26</i> -TS2 | CAATTCCCCTGCAGGACAACGCCACACAC   | NNNNACAC |
| 40 |                     | <i>Rosa26</i> -TS3 | GTGGGAAGTCTTGTCCTCCAATTTTACAC   | NNNNACAC |
| 41 | Mouse <i>Rosa26</i> | <i>Rosa26</i> -TS4 | ATTCTGCTTACATAGTCTAACTCGCGACAC  | NNNNACAC |
| 42 |                     | <i>Rosa26</i> -TS5 | GCAGCCTTATCAAAAGGTATTTTAGAACAC  | NNNNACAC |
| 43 |                     | <i>Rosa26</i> -TS6 | CATGAAACCAGACAGATTAGTTACATACAC  | NNNNACAC |
| 44 |                     | <i>Rosa26</i> -TS7 | AAATCGAGGCTGTAGCTGGGGCCTCAACAC  | NNNNACAC |
| 45 |                     | <i>Rosa26</i> -TS8 | CTGCAGTTCTTTTATAACTCCTTAGTACAC  | NNNNACAC |
| 46 |                     | <i>Tp53</i> -TS1   | ATGTGTTTCATTAGTTCCCACCTTGACAC   | NNNNACAC |
| 47 | Mouse <i>Tp53</i>   | <i>Tp53</i> -TS2   | GCCCTGTGCAGTTGTGGTCAGCGCCACAC   | NNNNACAC |
| 48 |                     | <i>Tp53</i> -TS3   | GCTCCGATGGTGATGGTAAGCCCTCAACAC  | NNNNACAC |
| 49 |                     | <i>Tp53</i> -TS4   | AGGTGTCAAGGTGGGGAAC TAATGAAACAC | NNNNACAC |
| 50 | Mouse <i>Vegfa</i>  | <i>Vegfa</i> -TS13 | AGCAGCCTGCACAGCGCATCAGCGGCACAC  | NNNNACAC |
| 51 |                     | <i>Vegfa</i> -TS14 | AGTCGCGCTGACGGACAGACAGACACAC    | NNNNACAC |
| 52 | Mouse <i>Hif1a</i>  | <i>Hif1a</i> -TS5  | CATGAGGAAATGAGAGAAATGCTTACACAC  | NNNNACAC |



**Supplementary Table 2. Indel frequencies at on-target and potential off-target validated by Digenome-seq.**

| Target     | Location         | Target sequence (5' to 3') | Indel frequency (%)                   |              |               |
|------------|------------------|----------------------------|---------------------------------------|--------------|---------------|
|            |                  |                            | (-) RGEN                              | (+) RGEN     |               |
|            | <b>On-target</b> | <b>chr19 55627221</b>      | <b>ATATAAGGTGGTCCCAGCTCGGGGACAC</b>   | <b>0.02</b>  | <b>11.085</b> |
|            | AAVS1-TS1-02     | chr22 20990738             | gcATctGaTGGcCCCAGCTCTGTGACAC          | 0.004        | 0.008         |
|            | AAVS1-TS1-03     | chr17 17270109             | gctTcAGGTGaTCCCAGCcCAGAGGTAC          | 0.003        | 0             |
|            | AAVS1-TS1-04     | chr14 70581187             | caAgAAGGTGaaCCCAGCTCTCACATAC          | 0.013        | 0.024         |
|            | AAVS1-TS1-05     | chr17 79782954             | ccttAAGGTGaTCCCAGCTCCCCGGCAC          | 0.03         | 0.041         |
|            | AAVS1-TS1-06     | chr8 80240626              | tTtacAGGcaaTCCCAGCTCTGAAACAC          | 0.043        | 0.059         |
|            | AAVS1-TS1-07     | chr9 129141695             | taAgccaGTGGTctCAGCTCCTCCACAC          | 0.014        | 0.022         |
|            | AAVS1-TS1-08     | chr21 41295936             | tTgcAAGaTGGcCCCAGCTCAGAAATAC          | 0.011        | 0.008         |
|            | AAVS1-TS1-09     | chr7 11346020              | tcgagAGGTtaTCCCAGCTCTAGAACAC          | 0.02         | 0.034         |
|            | AAVS1-TS1-10     | chr20 40758976             | ccAgcAGGTGGcCCCAGCTCCTGAGCAC          | 0            | 0             |
|            | AAVS1-TS1-11     | chr4 153926891             | CTgacAGGagacCCCAGCTCCAACACAC          | 0            | 0             |
|            | AAVS1-TS1-12     | chr22 46402289             | AgAgAgGGTGGcCCCAGCcTACGACAC           | 0.006        | 0.003         |
|            | AAVS1-TS1-13     | chrX 27472673              | AcAggAGaTgaTCCCAGCTCCTGCACAC          | 0.279        | 0.318         |
| AAVS1-TS1  | AAVS1-TS1-14     | chr7 128481430             | ATAtggtGTGGTCCCAGCTCACACACAC          | 0.024        | 0.034         |
|            | AAVS1-TS1-15     | chr1 30381084              | cctgActaTaGTCCCAGCTCTGAGACAC          | 0.041        | 0.027         |
|            | AAVS1-TS1-16     | chr22 46426607             | AgAgAgGGTGGcCCCAGCcTACGACAC           | 0.003        | 0.006         |
|            | AAVS1-TS1-17     | chr2 55333369              | CTcatctGTaGTCCCAGCTCAGACGCAC          | 0.079        | 0.092         |
|            | AAVS1-TS1-18     | chr8 141688584             | tgcacctGTGGTCCCAGCTCCCAGTAC           | 0.088        | 0.107         |
|            | AAVS1-TS1-19     | chr1 29848565              | gaAggAGGcaGcCCCAGCTCCCTCACAC          | 0.157        | 0.156         |
|            | AAVS1-TS1-20     | chr18 42305670             | gggggAGGAAGTCCCAGCTCTGCCACAA          | 0.035        | 0.04          |
|            | AAVS1-TS1-21     | chr7 142878579             | gatattgtGTGGTCCCAGCTCCTGCCAC          | 0.024        | 0.044         |
|            | AAVS1-TS1-22     | chr14 104753692            | ccAtcccaTGGTCCCAGCTCTCAGGCAC          | 0.035        | 0.038         |
|            | AAVS1-TS1-23     | chr14 102331176            | AaAcggtGGTGGTCCCAGCTCTCCCACCC         | 0.015        | 0.04          |
|            | AAVS1-TS1-24     | chr4 153532801             | gctaAttcTGGcCCCAGCTCTGCCACAC          | 0.003        | 0.004         |
|            | AAVS1-TS1-25     | chr9 83960768              | ATtagtGGTgaTCCCAGCTCTAACATAT          | 0.032        | 0.035         |
|            | AAVS1-TS1-26     | chr19 32268337             | cTgTAAaGTGGTaCCAGCTCAGACACAC          | 0.043        | 0.039         |
|            | AAVS1-TS1-27     | chr12 9085293              | AgcaccGGcaGTCCCAGCTCCTTCACAC          | 0.21         | 0.227         |
|            | <b>On-target</b> | <b>chr19 55624773</b>      | <b>GGAGTGTGACAGCCTGGGGCCAGGCACAC</b>  | <b>0.046</b> | <b>46.623</b> |
| AAVS1-TS8  | AAVS1-TS8-02     | chr19 32022965             | tGAGaGTGACAGCCTGGaGCC-AGCAACAC        | 0.002        | 0.001         |
|            | AAVS1-TS8-03     | chr9 136747231             | tGtcccgtACAGCCTGGGGCC-TGCCACAC        | 0.035        | 0.028         |
|            | AAVS1-TS8-04     | chr1 160176618             | tcgcTcTGACAGCCTGGGGCCAGACACAC         | 0.036        | 0.030         |
|            | AAVS1-TS8-05     | chr3 51397720              | atgtgGaGtCaCCTGGGGCC-TCGCACAC         | 0.040        | 0.042         |
| Vegfa-TS14 | <b>On-target</b> | <b>chr17 46031879</b>      | <b>AGTCGCGCTGACGGACAGACAGACAGACAC</b> | <b>0.00</b>  | <b>21.99</b>  |
|            | Vegfa-TS14-02    | chr7 43378546              | AGaCGaaCTGACaGACAGACAGACAAACAg        | 0.12         | 0.05          |
| Hif1a-TS5  | <b>On-target</b> | <b>chr12 73928281</b>      | <b>CATGAGGAAATGAGAGAAATGCTTACACAC</b> | <b>0.05</b>  | <b>30.72</b>  |
|            | Hif1a-TS5-02     | chr7 76970520              | ATGAGGAAATgGAGAtAAATGCTCAAACAC        | 0.01         | 0.01          |
|            | Hif1a-TS5-03     | chr1 24613117              | aAcccaGAAGaGAGtaAtcaaCCTGTACAC        | 0.10         | 0.11          |

**Supplementary Table 3. Indel frequencies at on-target and potential off-target predicted by Cas-OFFinder.**

| Target             | Location                | Target sequence (5' to 3') | Indel frequency (%) <sup>*</sup>                                                 |          | Indel frequency (%) <sup>**</sup> |          |       |
|--------------------|-------------------------|----------------------------|----------------------------------------------------------------------------------|----------|-----------------------------------|----------|-------|
|                    |                         |                            | (-) RGEN                                                                         | (+) RGEN | (-) RGEN                          | (+) RGEN |       |
| <i>Rosa26</i> -TS2 | On-target               | chr6                       | ATTCCCCTGCAGGACAACGC <b>CCACACAC</b>                                             | 0.00     | 13.29                             | 0.07     | 99.64 |
|                    | <i>Rosa26</i> -TS2-OT1  | chr3                       | ATTCCCCT <b>c</b> CcGGAC <b>c</b> Ac <b>C</b> TTCAACAC                           | 0.10     | 0.04                              | 0.09     | 0.04  |
|                    | <i>Rosa26</i> -TS2-OT2  | chr5                       | AT <b>c</b> agCCT <b>a</b> CAGGACAACGC <b>TGTTACAC</b>                           | 0.00     | 0.01                              | 0        | 0     |
|                    | <i>Rosa26</i> -TS2-OT3  | chr1                       | AT <b>c</b> agCCT <b>a</b> CAGGACAACGC <b>TGTTACAC</b>                           | 0.00     | 0.03                              | 0.01     | 0.02  |
|                    | <i>Rosa26</i> -TS2-OT4  | chr1                       | Aa <b>T</b> gC <b>C</b> tGCAGGACAAC <b>a</b> C <b>TGGCACAC</b>                   | 0.00     | 0.00                              | 0        | 0     |
|                    | <i>Rosa26</i> -TS2-OT5  | chr13                      | ATTCC <b>C</b> a <b>T</b> g <b>G</b> AGGACAA <b>aa</b> CAATCACAC                 | 0.02     | 0.00                              | 0.05     | 0.08  |
|                    | <i>Rosa26</i> -TS2-OT6  | chr2                       | ATTCCCCTG <b>C</b> t <b>cc</b> ACAAC <b>cc</b> ACCCACAC                          | 0.07     | 0.09                              | 0.03     | 0.01  |
|                    | <i>Rosa26</i> -TS2-OT7  | chr9                       | ATTCC <b>t</b> CT <b>c</b> CAGGACAAC <b>aa</b> GGACACAC                          | 0.00     | 0.00                              | 0.01     | 0     |
|                    | <i>Rosa26</i> -TS2-OT8  | chr11                      | AcaCC <b>C</b> CTGCAG <b>c</b> GAC <b>c</b> CGC <b>ACTCACAC</b>                  | 0.00     | 0.00                              | 0        | 0     |
|                    | <i>Rosa26</i> -TS2-OT9  | chr11                      | <b>c</b> TTCCCCTGCAG <b>t</b> ACA <b>ca</b> GC <b>AAACACAC</b>                   | 0.01     | 0.04                              | 0        | 0     |
|                    | <i>Rosa26</i> -TS2-OT10 | chr14                      | ATTCC <b>t</b> CTGC <b>aa</b> GACAAC <b>t</b> CGGCAGCAC                          | 0.00     | 0.00                              | 0        | 0     |
|                    | <i>Rosa26</i> -TS2-OT11 | chr15                      | <b>t</b> TgCC <b>C</b> CTGC <b>aa</b> GACAACGC <b>GCTTATAC</b>                   | 0.00     | 0.00                              | 0        | 0     |
|                    | <i>Rosa26</i> -TS2-OT12 | chr6                       | ATT <b>C</b> t <b>C</b> CTGCAGG <b>A</b> t <b>AA</b> g <b>C</b> T <b>TGCATAC</b> | 0.01     | 0.01                              | 0.01     | 0.01  |
|                    | <i>Rosa26</i> -TS2-OT13 | chr6                       | ATTCC <b>t</b> CTGCAGG <b>Ag</b> Ag <b>CG</b> CT <b>TGAAGCAC</b>                 | 0.00     | 0.00                              | 0        | 0     |
|                    | <i>Rosa26</i> -TS2-OT14 | chr11                      | <b>t</b> TTCCCCT <b>c</b> CAGG <b>Ag</b> AA <b>t</b> GC <b>CTGAGCAC</b>          | 0.02     | 0.01                              | 0        | 0     |
|                    | <i>Rosa26</i> -TS2-OT15 | chr17                      | <b>c</b> T <b>ga</b> CC <b>C</b> CTGCAG <b>c</b> ACAACGC <b>CTGTGCAC</b>         | 0.00     | 0.00                              | 0        | 0     |
|                    | <i>Rosa26</i> -TS2-OT16 | chr19                      | <b>g</b> TTCCCCT <b>t</b> CAGGACA <b>g</b> C <b>c</b> CT <b>TGAAGCAC</b>         | 0.00     | 0.00                              | 0        | 0.01  |
|                    | <i>Rosa26</i> -TS2-OT17 | chr4                       | ATTCCCCT <b>c</b> CAGGAC <b>t</b> t <b>cc</b> CATAATAC                           | 0.02     | 0.02                              | 0.06     | 0.06  |
|                    | <i>Rosa26</i> -TS2-OT18 | chr4                       | <b>c</b> TTCCCCTGCAGGAC <b>ct</b> CG <b>g</b> CCATATAC                           | 0.00     | 0.00                              | 0.02     | 0.01  |
|                    | <i>Rosa26</i> -TS2-OT19 | chr6                       | ATT <b>G</b> C <b>C</b> tGCAGGACA <b>c</b> Ca <b>CAATGATAC</b>                   | 0.00     | 0.01                              | 0        | 0     |
|                    | <i>Rosa26</i> -TS2-OT20 | chr9                       | ATTCCC <b>a</b> GCAGG <b>c</b> CA <b>aga</b> C <b>GGGAGCAC</b>                   | 0.00     | 0.00                              | 0        | 0.01  |

\*Indel frequencies (%) in Fig.4d.

\*\*Indel frequencies (%) in Supplementary Fig. 3.

**Supplementary Table 4. Primers used in this study.**

| Target site          | Primer-F (5' to 3')    | Primer-R (5' to 3')   |
|----------------------|------------------------|-----------------------|
| AAVSI-TS1            | AGGAGGAGGCCTAAGGATGG   | TGTCATGGCATCTTCCAGGG  |
| AAVSI-TS2            | GCTCTGGGCGGAGGAATATG   | TCCGTGCGTCAGTTTTACCT  |
| AAVSI-TS3            | GCTCTGGGCGGAGGAATATG   | TCCGTGCGTCAGTTTTACCT  |
| AAVSI-TS4            | GCTCTGGGCGGAGGAATATG   | TCCGTGCGTCAGTTTTACCT  |
| AAVSI-TS5            | GGGACTAGAAAGGTGAAGAGCC | GAGGATCCTGGGAGGGAGAG  |
| AAVSI-TS6            | ATCCTCTCTGGCTCCATCGT   | CCGGTTAATGTGGCTCTGGT  |
| AAVSI-TS7            | CCCTGGAAGATGCCATGACA   | CCCTTCTTGTAGGCCGTGCAT |
| AAVSI-TS8            | GCTATGCAGGGTGGAGGAAG   | TGGACTTCGGCTTTTGTCCC  |
| AAVSI-TS9            | TCTCATCAATGCAGGCCTGG   | TTCCACTGAGCACTGAAGGC  |
| AAVSI-TS10           | TCTCATCAATGCAGGCCTGG   | TTCCACTGAGCACTGAAGGC  |
| AAVSI-TS11           | CCCCTACACCCCATTTTAC    | GTCAACAGTGACGGGGACC   |
| AAVSI-TS12           | CAGGGCTGATTTGACCCACT   | CCGTGTGGAAGGAAAGGGAG  |
| AAVSI-TS15           | AAAAGTAGGCTGTCTGGGC    | TCTACCAGGCTGCCTTTTGG  |
| AAVSI-TS16           | GGTCTTCGTTCCTGGCTGAT   | CTTTTCCCTTGACCCCAGG   |
| AAVSI-TS17           | GGTCTTCGTTCCTGGCTGAT   | CTTTTCCCTTGACCCCAGG   |
| AAVSI-TS18           | ATCAAGGTCAACACAGGGGG   | TCACCATGTTGACCAGGCTG  |
| AAVSI-TS19           | TGAATCATGTCCCACCGCAT   | CTGGGAGGTGGAAGATGCAG  |
| AAVSI-TS20           | CAGCACACCAACATGGCAC    | GAGCCGAGATCTCACCCTG   |
| On-Target AAVSI-TS21 | AAGTTTGCTGACCCCTGCTT   | GGGAAGTGGTTGGTCAGCAT  |
| AAVSI-TS22           | GCTCTGGGCGGAGGAATATG   | TCCGTGCGTCAGTTTTACCT  |
| AAVSI-TS23           | GGGACTAGAAAGGTGAAGAGCC | GAGGATCCTGGGAGGGAGAG  |
| AAVSI-TS24           | GGGACTAGAAAGGTGAAGAGCC | GAGGATCCTGGGAGGGAGAG  |
| AAVSI-TS25           | CGCACCATTCTCACAAAGGG   | TGCTGCAGCTTCTTACACT   |
| AAVSI-TS26           | CTGAAGTGGACATAGGGGCC   | AGCCACCTCTCCATCCTCTT  |
| AAVSI-TS27           | TGGGTGAGGGAGGAGAGATG   | CGCTTCTGTCTGCAGCTTG   |
| AAVSI-TS28           | GAGGTGCTGTGTTTTGGCTG   | ATTACAGGCGTGAGTCACCG  |
| AAVSI-TS29           | AAAGAGGAAGCTGTCTCCGC   | AGTCTCAGCCAGCCACTTTC  |
| AAVSI-TS30           | TGTGTTTGCTGCTAGAGGGC   | GGTGTGTGGCCATCTGTAGG  |
| AAVSI-TS31           | TGTGTTTGCTGCTAGAGGGC   | GGTGTGTGGCCATCTGTAGG  |
| AAVSI-TS32           | AGGAGGAGGCCTAAGGATGG   | TGTCATGGCATCTTCCAGGG  |
| AAVSI-TS33           | AGGAGGAGGCCTAAGGATGG   | TGTCATGGCATCTTCCAGGG  |
| AAVSI-TS34           | CCCTGGAAGATGCCATGACA   | CCCTTCTTGTAGGCCGTGCAT |
| AAVSI-TS35           | TCCTACTCTAGCCCCAACC    | CTCTTGATTTCCCGCCAGTT  |
| AAVSI-TS36           | ATCAAGGTCAACACAGGGGG   | TCACCATGTTGACCAGGCTG  |
| AAVSI-TS37           | GGCAAGCCCAGGACTTTAGA   | GTCTTCTGGGAGGGGATGC   |
| AAVSI-TS38           | GACTCACACCCCATGACCTG   | GGGAAAGCCTGTGATCTCC   |
| AAVSI-TS39           | AAAGAGGAAGCTGTCTCCGC   | AGTCTCAGCCAGCCACTTTC  |

|            |                         |                          |                         |
|------------|-------------------------|--------------------------|-------------------------|
|            | <i>Rosa26</i> -TS2      | CGGGAGTCTTCTGGGCAGGCTTAA | CCGAGGCGGATCACAAGCAA    |
|            | <i>Vegfa</i> -TS14      | AGGGGCAAAGTGACTGACCTGC   | CTTCGGTTCCTCGCGGCTCG    |
|            | <i>Hif1a</i> -TS5       | GTCCCCATATATGAAGAGCAC    | CAATATCTGACTGAAAATCACCT |
|            | <i>Rosa26</i> -TS2-OT1  | TGGCCTCAGTGAGAGAAGAAA    | ATGGAGCTGTTGCCTCATTT    |
|            | <i>Rosa26</i> -TS2-OT2  | AGAGGCTGCACAAGAAAGGA     | CAGCCTCCCAAGTTCAGAGA    |
|            | <i>Rosa26</i> -TS2-OT3  | CTTTGGCCCTGTGAAGGTTA     | CTTGAAGGGTGTTC AATTGGT  |
|            | <i>Rosa26</i> -TS2-OT4  | ACCTTGTGAGTGGGAAGCAC     | TGGAGAAAACGACTCCATGA    |
|            | <i>Rosa26</i> -TS2-OT5  | GGTCTCAAAAGGTGGCTCAG     | GTGTGAATGGGGGAGAGAGA    |
|            | <i>Rosa26</i> -TS2-OT6  | TGCCTCCCAAGTGATAGGAT     | GAGAAGAGAGGCCCTTGTC     |
|            | <i>Rosa26</i> -TS2-OT7  | CACAGACCGTGGTTACCTGA     | ACTTCAGGCAAAGGGAAACC    |
|            | <i>Rosa26</i> -TS2-OT8  | TGTTTATGTGCAAGCCGTGT     | CCATCACAGGCACTCGTCTA    |
|            | <i>Rosa26</i> -TS2-OT9  | TGACTGAGCAGTGTGTGCAA     | AAGGGAGAAGCTGGGATCAG    |
|            | <i>Rosa26</i> -TS2-OT10 | TTTGTGCATAAACTTGGCTTTT   | GGCCAATCAAATGACCAAAC    |
|            | <i>Rosa26</i> -TS2-OT11 | TCATGTTCGACAACGTCACA     | AACAAGGCTGCCTGTCCAT     |
| Off-target | <i>Rosa26</i> -TS2-OT12 | AGACCCAGAGGAAGGACTC      | GGAAGAGATCACCGAATGGA    |
|            | <i>Rosa26</i> -TS2-OT13 | TGAACCATTTAAATTTGACAGCA  | CAAAGAGAGAGCAGGTCTGGA   |
|            | <i>Rosa26</i> -TS2-OT14 | GACGGAGGGTTCTCAGTTCA     | CCAGCATCTTGTGCTCTTGA    |
|            | <i>Rosa26</i> -TS2-OT15 | CCTGCTCTAAGGTCCAGTGC     | TGGGCTGAAAGCTGACTTA     |
|            | <i>Rosa26</i> -TS2-OT16 | TGGCTGGTTGGTTGACCTAT     | GCTTCCCCTGTGAGTTCTGA    |
|            | <i>Rosa26</i> -TS2-OT17 | TGCATTA ACTTGGGGTTCTTG   | AGAGCAGTGGGACAGGAGTG    |
|            | <i>Rosa26</i> -TS2-OT18 | TGCTGTCATCTGTGTTGCAG     | GCCACAA TGGGGCTATAAGT   |
|            | <i>Rosa26</i> -TS2-OT19 | CTGGGAGAAGACTGTT CAGGA   | GTGTGTTCTTTGGGGTTTGG    |
|            | <i>Rosa26</i> -TS2-OT20 | CAGGGGATCTAACACCCTCA     | CACCGGTGAAGTGAAAATTCTA  |
|            | <i>Vegfa</i> -TS14-OT1  | CCCTTCTTCCCTCTCTCCAT     | CAGCGTGCTC ACCATTCTAA   |
|            | <i>Hif1a</i> -TS5-OT1   | TGGATCCAAGCTGAGCAATG     | AGCCCAGTCC ACCATCTAAC   |
|            | <i>Hif1a</i> -TS5-OT2   | TCACATCAAAACATCACTTCGGA  | TGGGGAAGTC AGAATGCAAC   |
